# Supplementary material
Source: PubMed Central journal article supplement (PMC3138073)
Supplement: NIHMS304201-supplement-1_si_001.pdf [file NIHMS304201-supplement-1_si_001.pdf]

# Performance Characteristics of a New Hybrid Triple Quadrupole Time-of-Flight Tandem Mass Spectrometer

Genna L. Andrews<sup>1</sup>, Brigitte L. Simons<sup>2</sup>, J. Bryce Young<sup>2</sup>, Adam M. Hawkrigde<sup>1</sup> and David C. Muddiman<sup>1\*</sup>

<sup>1</sup>*W.M. Keck FT-ICR Mass Spectrometry Laboratory, Department of Chemistry, North Carolina State University, Raleigh, North Carolina 27695, USA*

<sup>2</sup>*AB SCIEX, Concord, Ontario L4K 4V8 Canada*

## Manuscript Revisions Submitted to:

*Analytical Chemistry*

**May 26, 2011**

**Supporting Information: 6 Pages**

### **\*Author for Correspondence**

David Muddiman, PhD.

W.M. Keck FT-ICR Mass Spectrometry Laboratory

Department of Chemistry

North Carolina State University

Raleigh, North Carolina 27695

Phone: 919-513-0084

Fax: 919-513-7993

Email: david\_muddiman@ncsu.edu

**Figure S-1** – Assessing peptide acquisition redundancy

**Figure S-2** - Assessing the distribution of mass and  $m/z$  of triplicate analysis

**Figure S-3** – Peptide signal distribution

**Figure S-4** – Influence of database tolerance search parameters on protein identification. **Table S-1** - List of the common protein modifications that the Protein Pilot software platform includes in database searching.

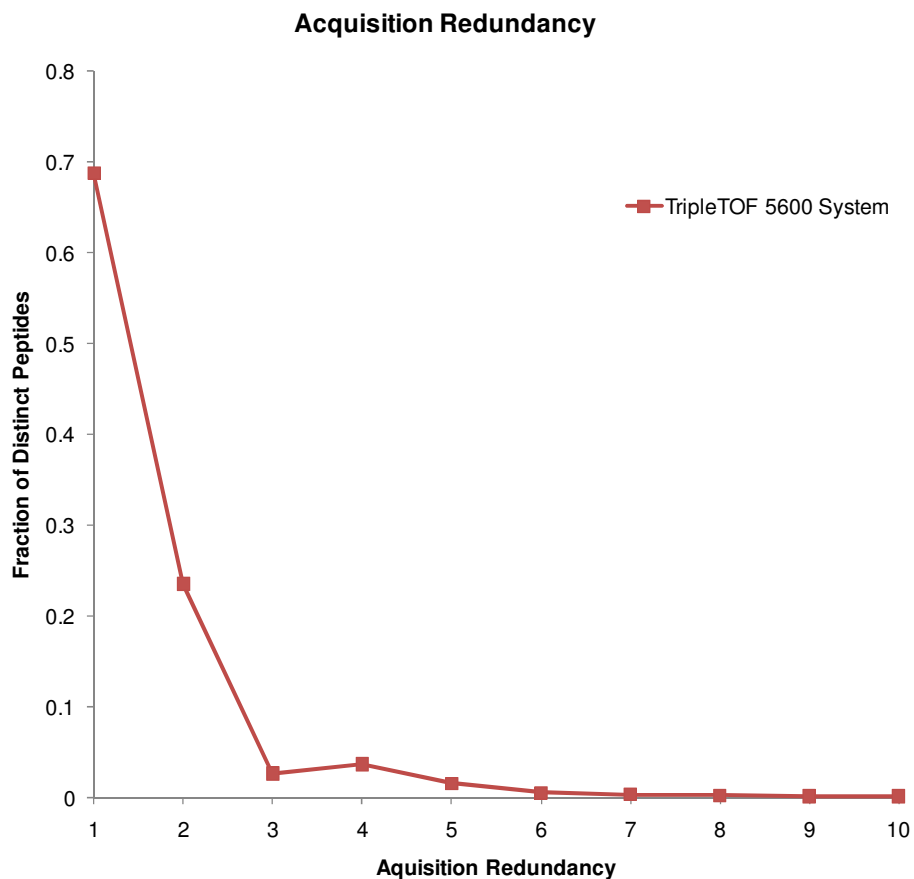

**Figure S-1** - Assessing the acquisition redundancy of the TripleTOF which identified 9771 peptides at 1% FDR for a single injection. The TripleTOF is set to select ions approximately twice (see **Experimental**). However, this is not true for the majority of the time with this particular sample and parameters, and may be due to one of the following: (1) peak width could be shorter than the exclusion time of 8 s and then the precursor signal fell short of the threshold; (2) charge state could not be determined after the first round of MS/MS, thus would not be triggered again; or (3) there were 8, 20, or 50 more precursors that were of higher signal, thus those were prioritized over the precursor in question, and not picked up a second time.

**a** Mass Distribution of Confident Peptides

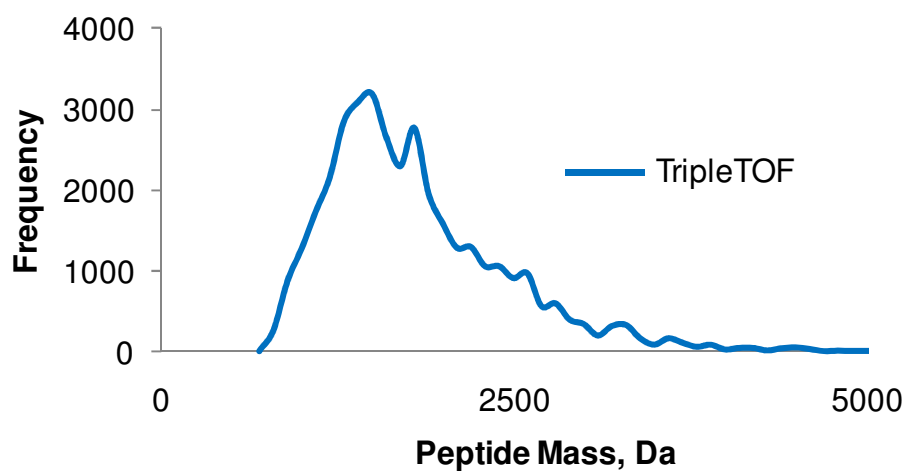

**b**  $m/z$  Distribution of Confident Peptides

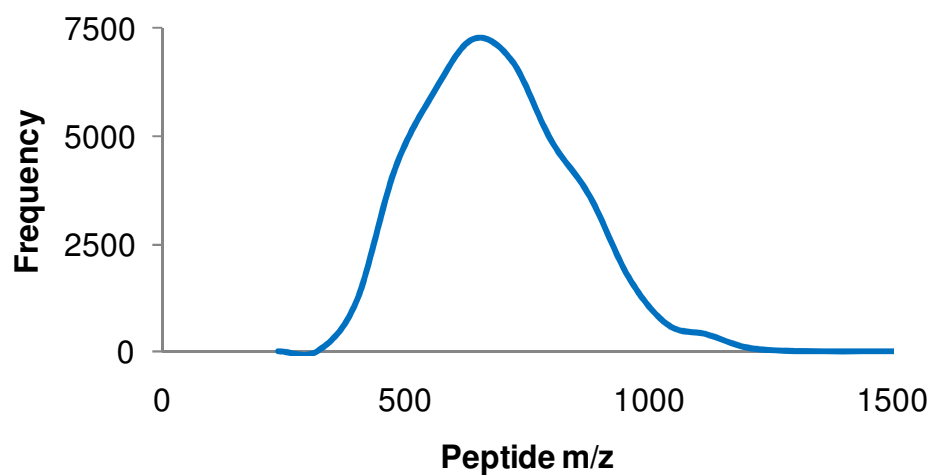

**Figure S-2** - Assessing the dynamic range of mass and  $m/z$  of triplicate analysis. The mass distribution (**a**) and  $m/z$  distribution (**b**) are evaluated by the frequency of the measurement.

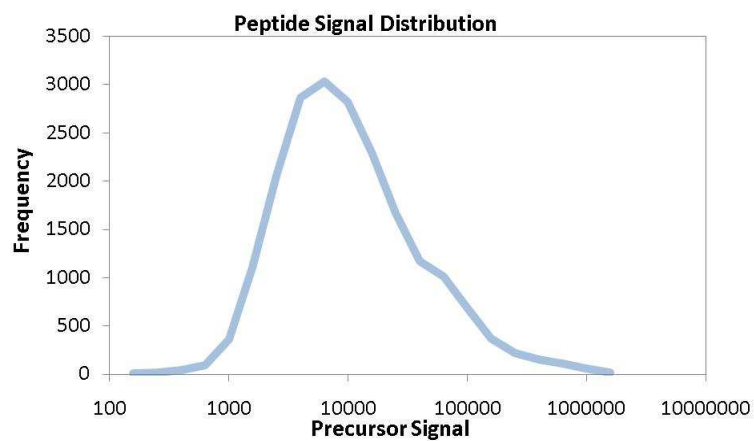

**Figure S-3** – Demonstration of the dynamic range of the precursor ion. Frequency is plotted as a function of the dynamic range (signal intensity) of the precursor signal. Here, precursor ions afforded signal intensity from approximately 500 to over 1,000,000 which is almost 4 orders of magnitude.

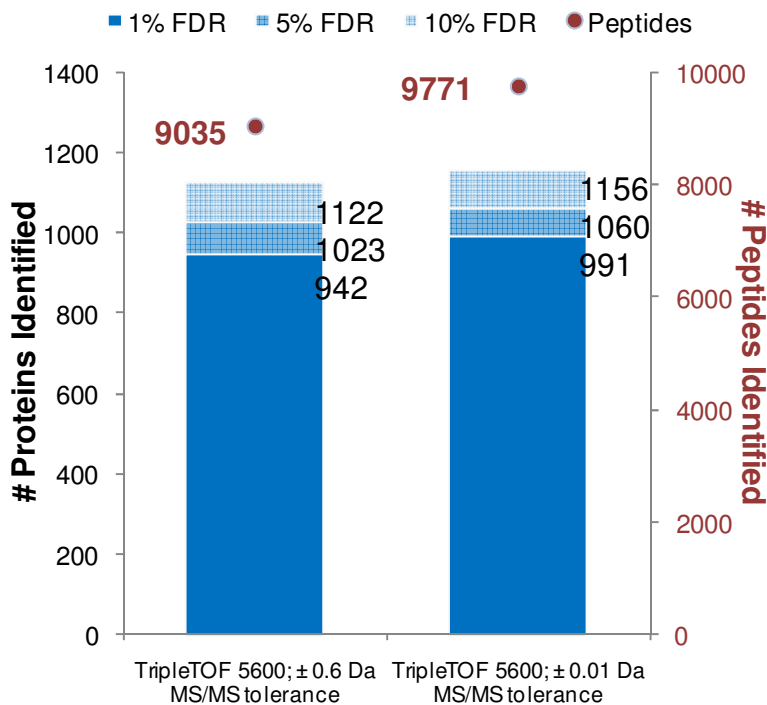

**Figure S-4** - The influence of the MS/MS tolerance window on the TripleTOF platform, indication of number of proteins identified at three different FDR maximums, and the number of peptides identified at 1% FDR for each search condition of a single nLC-MS run. The conservative improvement in identified proteins as a function of decreasing the MS/MS tolerance window demonstrates that the high RP of the fragment ions is not the key figure of merit in protein identification by the TripleTOF; the speed on the instrument platform key Concerning FDR, similar trends are exhibited at either tolerance window suggesting that a similar numbers of decoy species relative to the number of proteins at 1% FDR are identified and the fragment ion high-mass accuracy does not exclusively contribute to greater proteome coverage.

| <b>Top Modifications</b>  |
|---------------------------|
| Carboxamidomethyl (C)     |
| Deamidation               |
| Oxidation (M)             |
| PyroGlutamic Acid (Q)     |
| Peptide N-terminal Formyl |
| Methyl Ester (D,E)        |
| O-Phosphoryl (S,T,Y)      |
| Dehydration (D,E)         |
| Kynurenin (W)             |
| Formylkynurenin (W)       |
| Protein N-Terminal Acetyl |
| Peptide N-Terminal Acetyl |
| Nitro (Y)                 |
| Methyl (K)                |
| Carbamyl (K)              |

**Table S-1** - The Paragon protein searching algorithm searches common peptide and protein modifications described here as well as others detailed in Shilov *et al.*
